# Supplementary material
Source: publisher site journal article supplement (https://www.jstage.jst.go.jp/article/geochemj/49/5/49_2.0382/_supplement/_download/49_2.0382_1.pdf)
Supplement: Supplementary file 1 [file 49_2.0382_1.pdf]

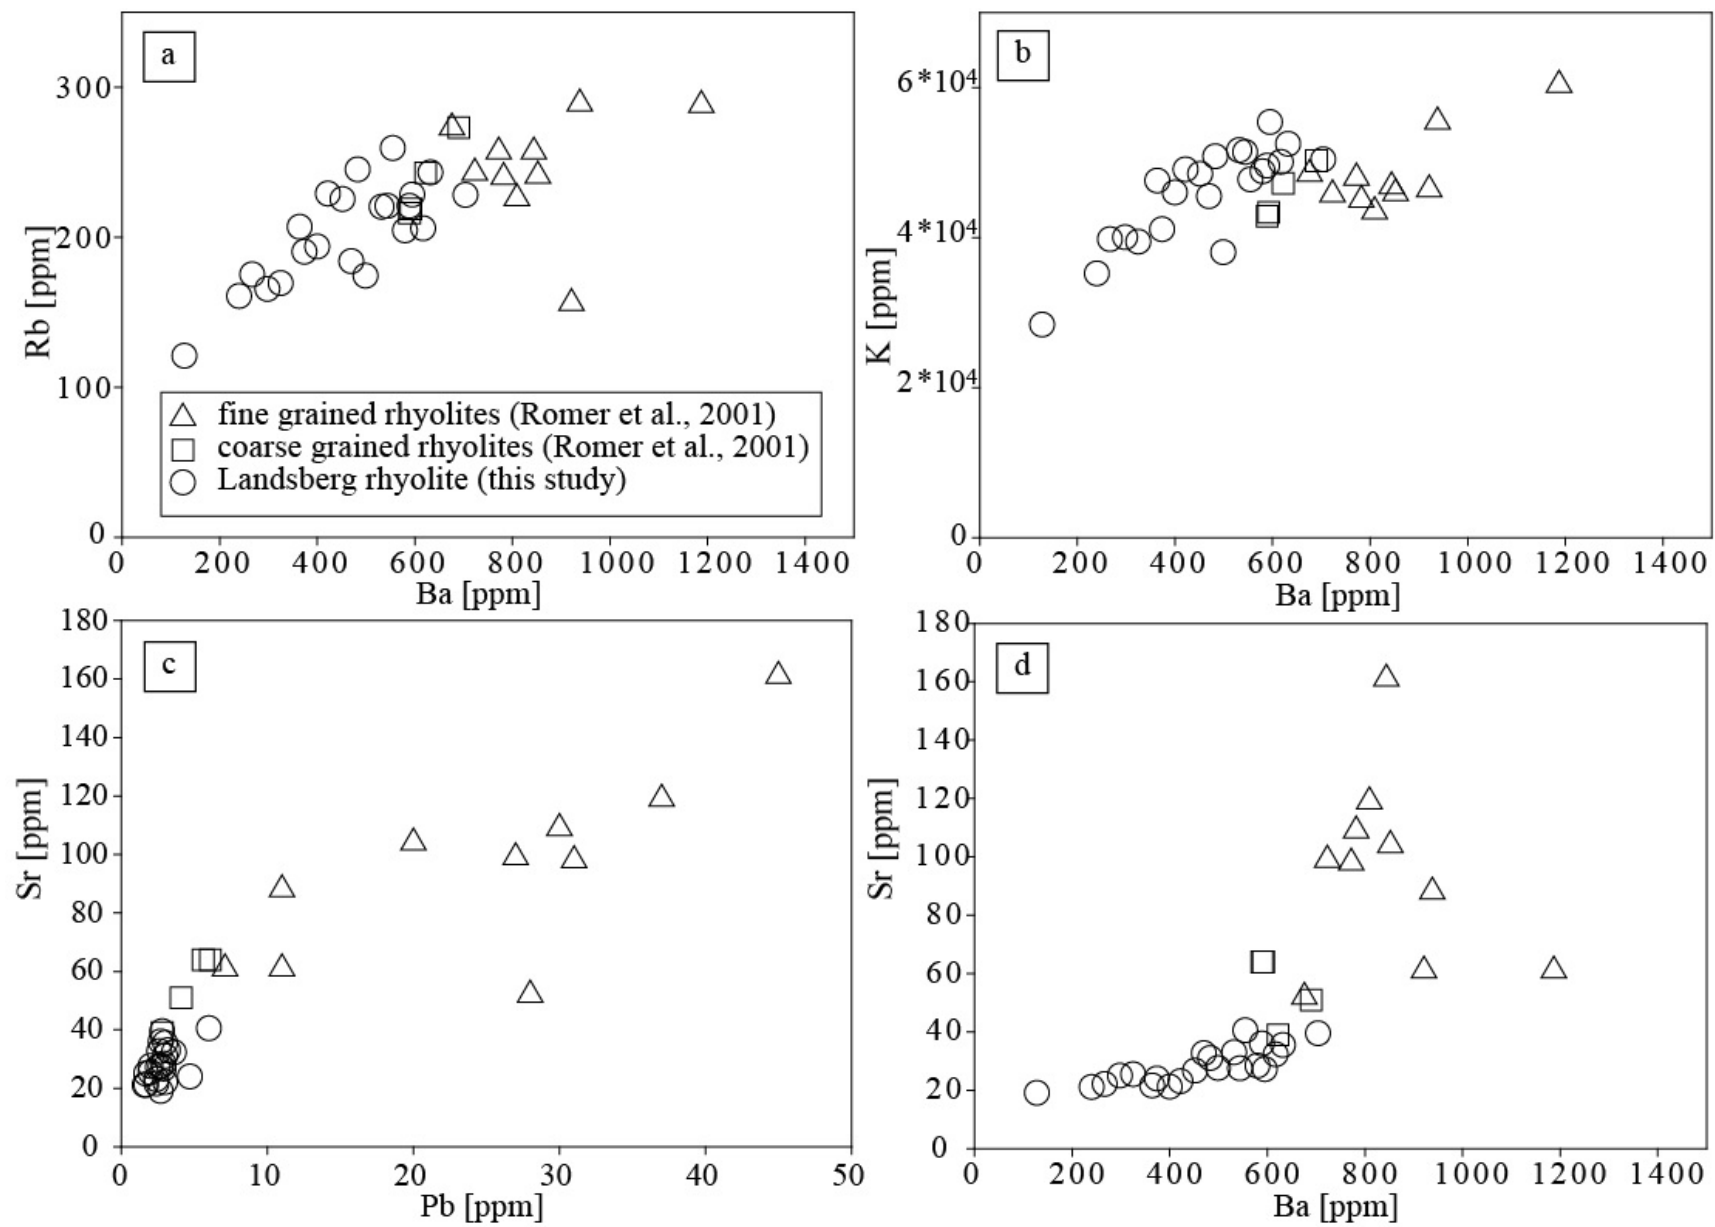

Fig. S1

Table S1

| depth [m] | Qtz         | Pl          | Kfs         | Opx        | background  |
|-----------|-------------|-------------|-------------|------------|-------------|
| 29        | 8.7         | 12.7        | 10.4        | 2.4        | 65.8        |
| 56        | 8.2         | 13.0        | 8.8         | 2.2        | 67.8        |
| 76        | 6.3         | 15.8        | 10.3        | 2.2        | 65.4        |
| 102       | 9.2         | 15.3        | 10.6        | 2.7        | 62.2        |
| 128       | 6.9         | 14.2        | 15.8        | 2.6        | 60.5        |
| 155       | 9.0         | 8.3         | 13.6        | 2.9        | 66.2        |
| 175       | 8.9         | 14.1        | 15.4        | 3.3        | 58.3        |
| 197       | 8.6         | 11.4        | 16.2        | 3.8        | 60.0        |
| 201       | 10.4        | 13.4        | 8.9         | 3.5        | 63.8        |
| 225       | 9.9         | 12.3        | 12.4        | 2.6        | 62.8        |
| 245       | 13.4        | 11.7        | 9.9         | 3.6        | 61.4        |
| 281       | 7.8         | 7.4         | 17.6        | 2.2        | 65.0        |
| 304       | 8.9         | 14.3        | 10.4        | 1.9        | 64.5        |
| 357       | 7.0         | 10.2        | 18.2        | 1.8        | 62.8        |
| 378       | 8.6         | 8.8         | 9.7         | 3.6        | 69.3        |
| 400       | 9.2         | 11.2        | 13.5        | 4.5        | 61.6        |
| 452       | 8.2         | 10.4        | 12.4        | 2.0        | 67.0        |
| 481       | 8.9         | 13.5        | 11.3        | 4.2        | 62.1        |
| 29        | <i>9.9</i>  | <i>13.7</i> | <i>8.8</i>  | <i>2.0</i> | <i>65.6</i> |
| 56        | <i>7.2</i>  | <i>13.8</i> | <i>7.2</i>  | <i>3.1</i> | <i>68.7</i> |
| 76        | <i>5.7</i>  | <i>12.7</i> | <i>12.3</i> | <i>2.6</i> | <i>66.7</i> |
| 102       | <i>30.8</i> | <i>13.0</i> | <i>8.2</i>  | <i>0.9</i> | <i>47.1</i> |
| 128       | <i>6.0</i>  | <i>9.1</i>  | <i>11.5</i> | <i>4.3</i> | <i>69.1</i> |
| 155       | <i>12.2</i> | <i>8.7</i>  | <i>11.7</i> | <i>3.0</i> | <i>64.4</i> |
| 175       | <i>5.5</i>  | <i>10.6</i> | <i>17.5</i> | <i>3.7</i> | <i>62.7</i> |
| 197       | <i>8.3</i>  | <i>10.5</i> | <i>12.0</i> | <i>3.9</i> | <i>65.3</i> |
| 201       | <i>8.7</i>  | <i>12.7</i> | <i>7.4</i>  | <i>3.0</i> | <i>68.2</i> |
| 225       | <i>11.6</i> | <i>6.9</i>  | <i>15.0</i> | <i>2.5</i> | <i>64.0</i> |
| 245       | <i>11.3</i> | <i>9.7</i>  | <i>8.6</i>  | <i>3.9</i> | <i>66.5</i> |

Table S2: Reference materials (RM) and preparation duplicates (PD) of analysed rhyolite samples

| Method | Analyte                        | Unit | MDL   | LA 430     | LA 430    | LA 304     | LA 304    | STD SO-18 | STD SO-18 | BLK       | QUARTZ           | QUARTZ           | QUARTZ           |
|--------|--------------------------------|------|-------|------------|-----------|------------|-----------|-----------|-----------|-----------|------------------|------------------|------------------|
|        |                                |      |       | PD<br>Rock | PD<br>REP | PD<br>Rock | PD<br>DUP | RM<br>STD | RM<br>STD | RM<br>BLK | RM<br>Prep Blank | RM<br>Prep Blank | RM<br>Prep Blank |
| WGHT   | Wgt                            | KG   | 0.01  | 0.19       |           | 0.12       |           |           |           |           |                  |                  |                  |
| LF200  | SiO <sub>2</sub>               | %    | 0.01  | 72.32      | 72.26     | 72.23      | 72.13     | 58.14     | 58.13     | 0.02      | 98.86            | 98.64            | 98.86            |
| LF200  | Al <sub>2</sub> O <sub>3</sub> | %    | 0.01  | 13.31      | 13.31     | 13.07      | 13.24     | 14.22     | 14.10     | <0.01     | 0.50             | 0.55             | 0.50             |
| LF200  | Fe <sub>2</sub> O <sub>3</sub> | %    | 0.04  | 2.19       | 2.17      | 2.52       | 2.53      | 7.62      | 7.57      | <0.04     | 0.32             | 0.28             | 0.32             |
| LF200  | MgO                            | %    | 0.01  | 1.02       | 1.00      | 0.59       | 0.61      | 3.38      | 3.41      | <0.01     | 0.03             | 0.04             | 0.03             |
| LF200  | CaO                            | %    | 0.01  | 0.64       | 0.64      | 0.75       | 0.85      | 6.34      | 6.37      | <0.01     | 0.01             | <0.01            | 0.01             |
| LF200  | Na <sub>2</sub> O              | %    | 0.01  | 2.77       | 2.76      | 2.42       | 2.40      | 3.59      | 3.65      | <0.01     | <0.01            | <0.01            | <0.01            |
| LF200  | K <sub>2</sub> O               | %    | 0.01  | 5.75       | 5.85      | 5.91       | 5.74      | 2.14      | 2.20      | <0.01     | 0.04             | 0.08             | 0.04             |
| LF200  | TiO <sub>2</sub>               | %    | 0.01  | 0.21       | 0.21      | 0.21       | 0.21      | 0.68      | 0.69      | <0.01     | 0.08             | 0.10             | 0.08             |
| LF200  | P <sub>2</sub> O <sub>5</sub>  | %    | 0.01  | 0.06       | 0.06      | 0.06       | 0.06      | 0.78      | 0.79      | <0.01     | <0.01            | 0.01             | <0.01            |
| LF200  | MnO                            | %    | 0.01  | 0.02       | 0.02      | 0.02       | 0.02      | 0.39      | 0.39      | <0.01     | <0.01            | <0.01            | <0.01            |
| LF200  | Cr <sub>2</sub> O <sub>3</sub> | %    | 0.002 | <0.002     | <0.002    | <0.002     | <0.002    | 0.542     | 0.543     | <0.002    | 0.003            | 0.003            | 0.003            |
| LF200  | Ni                             | ppm  | 20    | <20        | <20       | <20        | <20       | 50        | 46        | <20       | <20              | <20              | <20              |
| LF200  | Sc                             | ppm  | 1     | 6          | 6         | 6          | 5         | 24        | 24        | <1        | <1               | <1               | <1               |
| LF200  | LOI                            | %    | -5.1  | 1.6        | 1.6       | 2.1        | 2.1       | 1.9       | 1.9       | 0.0       | 0.2              | 0.3              | 0.2              |
| LF200  | Sum                            | %    | 0.01  | 99.86      | 99.86     | 99.88      | 99.89     | 99.73     | 99.74     | <0.01     | 99.99            | 99.99            | 99.99            |
| LF200  | Ba                             | ppm  | 1     | 555        | 542       | 422        | 407       | 533       | 518       | <1        | 13               | 15               | 13               |
| LF200  | Be                             | ppm  | 1     | 1          | 2         | 3          | 2         | <1        | <1        | <1        | <1               | <1               | <1               |
| LF200  | Co                             | ppm  | 0.2   | 1.7        | 1.5       | 2.5        | 2.2       | 26.1      | 26.7      | <0.2      | 0.3              | 0.2              | 0.3              |
| LF200  | Cs                             | ppm  | 0.1   | 11.2       | 10.4      | 3.1        | 3.3       | 7.4       | 7.1       | <0.1      | 0.2              | <0.1             | 0.2              |
| LF200  | Ga                             | ppm  | 0.5   | 19.3       | 17.7      | 18.4       | 19.0      | 17.3      | 17.3      | <0.5      | <0.5             | 0.9              | <0.5             |
| LF200  | Hf                             | ppm  | 0.1   | 5.7        | 5.3       | 5.5        | 5.5       | 9.4       | 9.5       | <0.1      | 4.3              | 5.2              | 4.3              |
| LF200  | Nb                             | ppm  | 0.1   | 19.5       | 17.7      | 18.4       | 18.4      | 18.8      | 20.3      | 0.2       | 1.8              | 2.2              | 1.8              |
| LF200  | Rb                             | ppm  | 0.1   | 259.4      | 262.1     | 229.0      | 227.2     | 27.4      | 27.8      | 0.1       | 3.2              | 3.4              | 3.2              |
| LF200  | Sn                             | ppm  | 1     | 8          | 7         | 5          | 6         | 14        | 14        | <1        | <1               | <1               | <1               |
| LF200  | Sr                             | ppm  | 0.5   | 40.5       | 40.7      | 23.1       | 22.9      | 379.3     | 375.2     | <0.5      | 12.2             | 11.8             | 12.2             |
| LF200  | Ta                             | ppm  | 0.1   | 1.5        | 1.4       | 1.7        | 1.3       | 7.1       | 6.5       | <0.1      | 0.1              | 0.1              | 0.1              |
| LF200  | Th                             | ppm  | 0.2   | 17.7       | 17.7      | 18.2       | 17.6      | 9.3       | 9.4       | <0.2      | 1.2              | 1.5              | 1.2              |
| LF200  | U                              | ppm  | 0.1   | 4.7        | 4.8       | 4.4        | 4.3       | 14.8      | 15.0      | <0.1      | 0.4              | 0.3              | 0.4              |
| LF200  | V                              | ppm  | 8     | 15         | 32        | 24         | 15        | 211       | 202       | <8        | <8               | <8               | <8               |

|       |       |     |      |       |       |       |       |       |       |       |       |       |       |
|-------|-------|-----|------|-------|-------|-------|-------|-------|-------|-------|-------|-------|-------|
| LF200 | W     | ppm | 0.5  | 3.3   | 4.5   | 1.5   | 2.0   | 14.8  | 15.3  | <0.5  | <0.5  | <0.5  | <0.5  |
| LF200 | Zr    | ppm | 0.1  | 183.9 | 179.5 | 187.0 | 200.1 | 294.0 | 295.0 | 0.2   | 178.3 | 212.4 | 178.3 |
| LF200 | Y     | ppm | 0.1  | 33.0  | 31.8  | 39.2  | 38.5  | 30.2  | 30.7  | <0.1  | 3.2   | 3.4   | 3.2   |
| LF200 | La    | ppm | 0.1  | 50.1  | 52.2  | 52.1  | 47.9  | 13.5  | 13.2  | <0.1  | 8.4   | 7.9   | 8.4   |
| LF200 | Ce    | ppm | 0.1  | 105.6 | 105.1 | 107.3 | 101.2 | 25.7  | 26.8  | <0.1  | 17.0  | 17.3  | 17.0  |
| LF200 | Pr    | ppm | 0.02 | 12.20 | 12.07 | 12.58 | 11.61 | 3.22  | 3.29  | <0.02 | 1.83  | 1.88  | 1.83  |
| LF200 | Nd    | ppm | 0.3  | 42.2  | 42.9  | 44.6  | 42.6  | 13.6  | 13.7  | <0.3  | 6.9   | 6.6   | 6.9   |
| LF200 | Sm    | ppm | 0.05 | 7.74  | 7.80  | 8.25  | 7.51  | 2.93  | 2.66  | <0.05 | 0.98  | 0.99  | 0.98  |
| LF200 | Eu    | ppm | 0.02 | 0.70  | 0.74  | 0.86  | 0.85  | 0.78  | 0.83  | <0.02 | 0.15  | 0.16  | 0.15  |
| LF200 | Gd    | ppm | 0.05 | 6.56  | 6.47  | 7.50  | 7.08  | 2.84  | 2.97  | <0.05 | 0.67  | 0.75  | 0.67  |
| LF200 | Tb    | ppm | 0.01 | 1.02  | 1.02  | 1.18  | 1.19  | 0.47  | 0.46  | <0.01 | 0.11  | 0.11  | 0.11  |
| LF200 | Dy    | ppm | 0.05 | 5.80  | 5.83  | 7.03  | 6.92  | 2.81  | 3.14  | <0.05 | 0.52  | 0.62  | 0.52  |
| LF200 | Ho    | ppm | 0.02 | 1.11  | 1.10  | 1.34  | 1.34  | 0.53  | 0.59  | <0.02 | 0.10  | 0.11  | 0.10  |
| LF200 | Er    | ppm | 0.03 | 3.19  | 3.29  | 3.99  | 3.95  | 1.72  | 1.76  | <0.03 | 0.38  | 0.38  | 0.38  |
| LF200 | Tm    | ppm | 0.01 | 0.50  | 0.46  | 0.61  | 0.56  | 0.27  | 0.24  | <0.01 | 0.05  | 0.05  | 0.05  |
| LF200 | Yb    | ppm | 0.05 | 2.96  | 2.97  | 3.66  | 3.63  | 1.69  | 1.76  | <0.05 | 0.33  | 0.35  | 0.33  |
| LF200 | Lu    | ppm | 0.01 | 0.46  | 0.44  | 0.54  | 0.52  | 0.27  | 0.26  | <0.01 | 0.05  | 0.07  | 0.05  |
| TC000 | TOT/C | %   | 0.02 | 0.11  |       | 0.14  | 0.16  |       |       |       | <0.02 | <0.02 | <0.02 |
| TC000 | TOT/S | %   | 0.02 | <0.02 |       | <0.02 | <0.02 |       |       |       | <0.02 | <0.02 | <0.02 |
| AQ200 | Mo    | ppm | 0.1  | 0.6   |       | 0.5   | 0.6   |       |       |       | 0.5   | 0.3   | 0.5   |
| AQ200 | Cu    | ppm | 0.1  | 5.1   |       | 3.0   | 5.8   |       |       |       | 3.6   | 3.5   | 3.6   |
| AQ200 | Pb    | ppm | 0.1  | 6.0   |       | 2.4   | 2.6   |       |       |       | 1.9   | 1.7   | 1.9   |
| AQ200 | Zn    | ppm | 1    | 13    |       | 39    | 48    |       |       | 3     | 6     |       | 3     |
| AQ200 | Ni    | ppm | 0.1  | 2.4   |       | 2.8   | 4.1   |       |       | 1.2   | 1.6   |       | 1.2   |
| AQ200 | As    | ppm | 0.5  | 1.1   |       | 1.1   | 1.4   |       |       | 1.3   | 1.0   |       | 1.3   |
